# Supplementary material for: Doubly spin-labeled nanodiscs to improve structural determination of membrane proteins by ESR
Source: PubMed Central journal article supplement — RSC Adv. 2019 Mar 19;9(16):9014–21. doi: 10.1039/c9ra00896a (PMC9062051; doi:10.1039/c9ra00896a), 2019-03-19
Supplement: RA-009-C9RA00896A-s001.pdf [file RA-009-C9RA00896A-s001.pdf]

*Electric Supplementary Information for*  
**Doubly spin-labeled nanodiscs to improve structural determination of  
membrane proteins by ESR**

Chieh-Chin Li, Chien-Lun Hung, Pei-Shan Yeh, Chi-En Li, and Yun-Wei Chiang\*

Department of Chemistry and Frontier Research Center on Fundamental and Applied  
Sciences of Matters, National Tsing Hua University, Hsinchu, Taiwan

\*Corresponding email: [ywchiang@gapp.nthu.edu.tw](mailto:ywchiang@gapp.nthu.edu.tw)

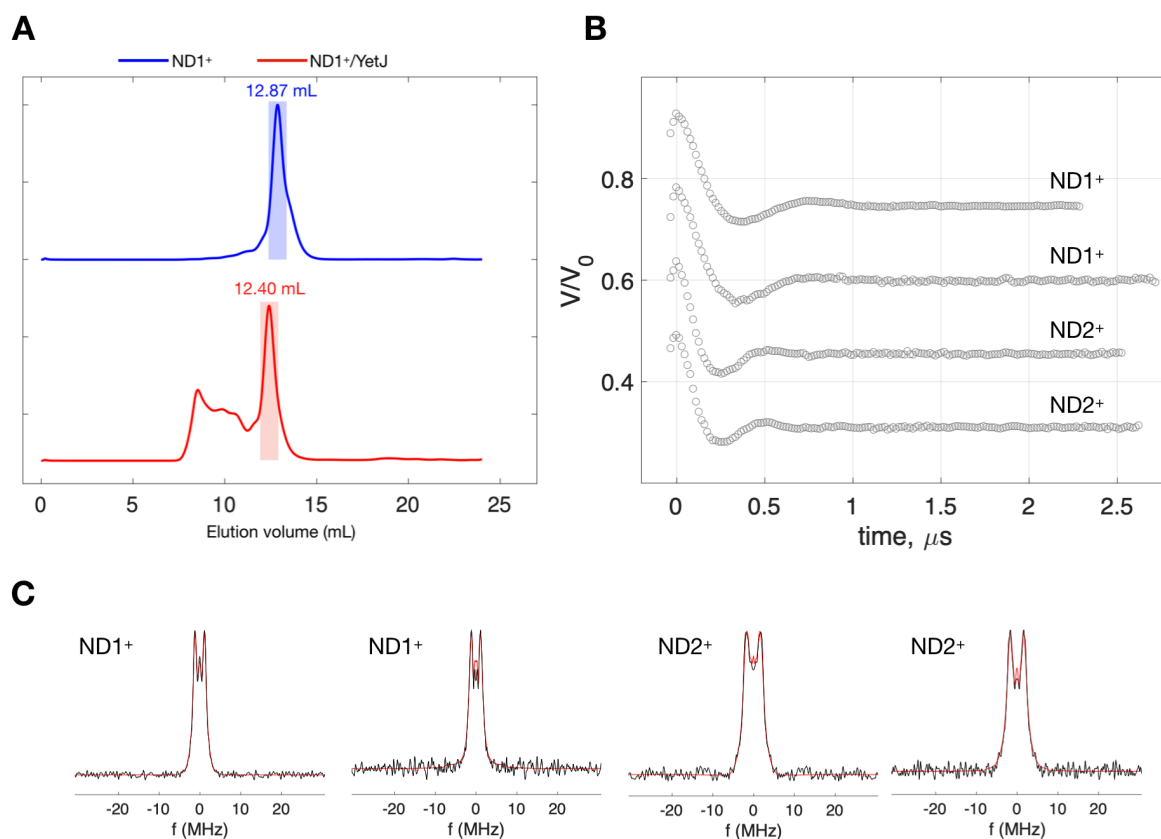

**Figure S1. Sample preparation and reproducibility.** (A) Representative purification results for empty ND1<sup>+</sup> and ND<sup>+</sup>/YetJ samples by size exclusion chromatography (SEC-FPLC). The homogeneity, as highlighted by shaded regions, is better for ND<sup>+</sup>/YetJ than ND1<sup>+</sup> owing to the passage through nickel column after nanodisc formation. The shaded areas also indicate the fractions collected for DEER measurements. (B) Representative background-corrected DEER traces of the samples ND1<sup>+</sup> and ND2<sup>+</sup> at pH 7. It shows that these ND<sup>+</sup> samples can be reliably reproduced with the protocol reported in this study such that the experimental DEER time-domain traces are reproducible in replicate experiments. Same average distances are obtained by TIKR for the replicate measurements of ND1<sup>+</sup> or ND2<sup>+</sup>. Pake doublet plots of these replicate measurements are shown in (C), confirming that the same dipolar frequency in the Pake doublets for ND1<sup>+</sup> (or ND2<sup>+</sup>) is obtained in the replicate measurements. The Pake doublets were generated using DeerAnalysis.

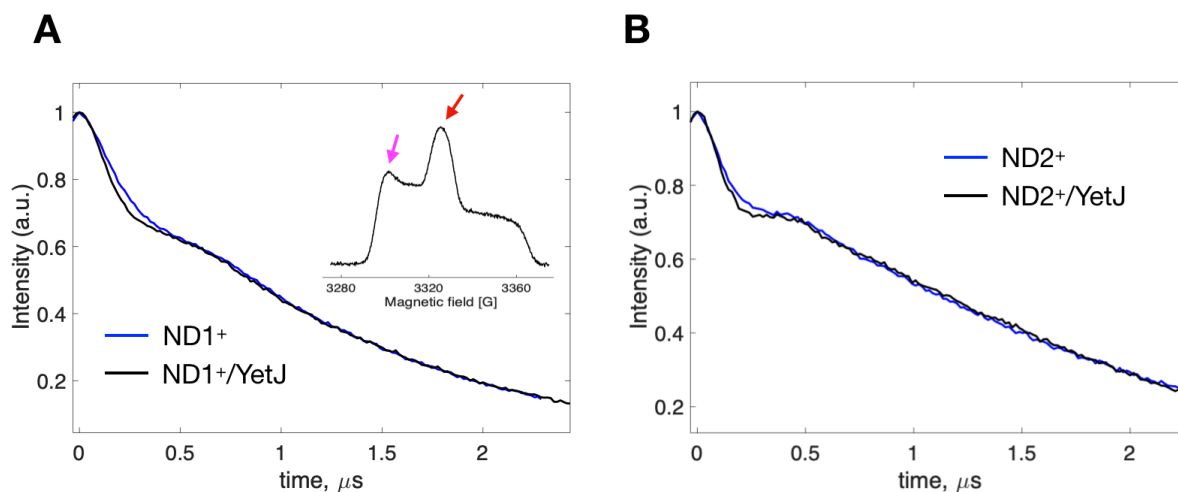

**Figure S2. Sensitivity of spin-labeled ND to the change in ND geometry.** (A) A comparison of the DEER experimental data of ND1<sup>+</sup> with/without the incorporated YetJ. For the sake of a clear comparison, the raw data are plotted with the modulation-depth scaling using the DeerAnalysis program. The subtle differences in the DEER traces between the ND1<sup>+</sup> and the ND1<sup>+</sup>/YetJ are clearly revealed, demonstrating the high sensitivity of ND1<sup>+</sup> to a change in the ND geometry. Specifically, the time-domain signal for ND1<sup>+</sup>/YetJ decays distinctly faster than that for ND1<sup>+</sup>, supporting a shorter interspin distance in the former. Inset: Hahn echo-detected field swept spectrum of ND1<sup>+</sup> and the positions of the pump and observe pulses (red and magenta arrows, respectively). The comparison of the DEER experimental data of ND2<sup>+</sup> with/without the incorporated YetJ is provided in (B), which leads to the same conclusion about the high sensitivity of doubly spin-labeled ND.

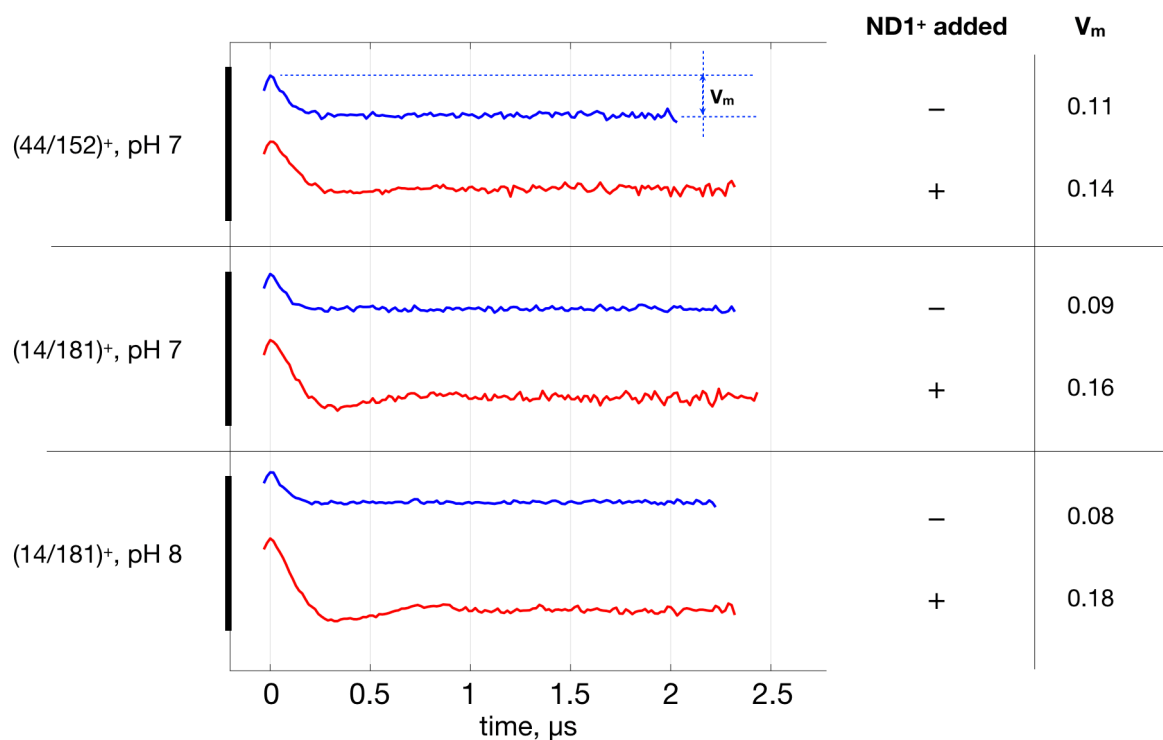

**Figure S3. DEER time-domain traces after the removal of background signals.** Data are displayed without normalization to the same magnitude so as to emphasize that when ND1<sup>+</sup> are present in the YetJ<sup>+</sup> (e.g., (44/152)<sup>+</sup> or (14/181)<sup>+</sup>) solutions, the overall dipolar modulation depth ( $V_m$ , as illustrated) is more clearly revealed in the background-corrected DEER traces. All samples shown have the same spin concentration, as described in Experimental. The presence of ND<sup>+</sup> samples, whose spin-labeling locations are more solvent-exposed, is useful to enhance the overall modulation depth of DEER signals and thus effectively improve the SNR of DEER data. Note that as the SNR of DEER data is defined by a ratio of the peak intensity to the root-mean-square of noise, it is directly proportional to the peak intensity (i.e.,  $V_m$ ) of the background-corrected data when all of the experimental data have a similar noise level. As shown, we observed an improvement of SNR in the range of 27% and 125%. With the SNR improvement, it directly leads to an enhancement in the distance resolution obtainable by TIKR, hence a distinct reduction in the distance distribution width as compared to the pure YetJ<sup>+</sup> results (Figs. 3 and 4).
